Title : DIFFERENTIAL EFFECTS OF HALOTHANE, ENFLURANE AND ISOFLURANE ON  $Ca^{++}$  TRANSIENTS AND PAPILLARY MUSCLE TENSION IN THE GUINEA PIG

Authors : ZJ Bosnjak, Ph.D., Aggarwal A, M.D., Turner LA, M.D. and JP Kampine, M.D., Ph.D.

Affiliation: Department of Anesthesiology, The Medical College of Wisconsin, and VA Medical Center, Milwaukee, Wisconsin 53295

**INTRODUCTION.** Isoflurane (I)-induced depression of ventricular function in the intact animal models<sup>1</sup> and isolated myocardial preparations<sup>2,3</sup> appears to be less than that of halothane (H) and enflurane (E). The mechanism responsible for this difference is controversial. Some investigators have concluded that the major effect of I is via inhibition of  $Ca^{++}$  influx,<sup>2</sup> while others attribute the difference to a greater effect on the SR.<sup>3</sup> In order to directly examine the availability of intracellular  $Ca^{++}$ , we have performed a comparative study of intracellular  $Ca^{++}$  transients and contractile force in the presence of H, E and I in the papillary muscle of the guinea pig.

**METHODS.** Right ventricular papillary muscles (mean  $OD = 0.7$  mm) were removed from 13 guinea pigs and superfused with oxygenated Krebs solution (30°C) containing 5 mM  $Ca^{++}$ . The muscles were field stimulated and the isometric force of contraction measured at 0.5-1 Hz pacing rate. The  $Ca^{++}$  sensitive bioluminescent protein aequorin was pressure injected into multiple superficial cells of each papillary muscle.<sup>4</sup> Digital signal averaging of 100 successive light signals was performed to obtain a good signal-to-noise ratio. The intracellular aequorin light signals provide a good indication of the overall magnitude and time course of the intracellular myoplasmic  $Ca^{++}$  concentrations. Peak  $Ca^{++}$  transients and peak isometric tension were determined before and after introduction of H, E and I in random order. The effects of all three anesthetic agents were tested in each preparation under identical conditions at following concentrations in the tissue bath: H: 0.31 & 0.55 mM, E: 0.48 & 1.06 mM and I: 0.37 & 0.78 mM as measured using a gas chromatograph. Statistical differences were determined using a 2-way ANOVA and LSD test.

**RESULTS.** The effects of H, E and I on the calcium transients and isometric force are summarized in Figure 1 (values are mean  $\pm$  SEM as a % of control). As seen, the negative inotropic effects of H and E were dose-dependent and closely related to a decrease in intracellular  $Ca^{++}$ . I also reduced contractile force in a dose-dependent manner but the decrease was significantly less as compared to H or E. A most striking feature observed with I was a dissociation between intracellular  $Ca^{++}$  availability and contractile force. Although the magnitude of the  $Ca^{++}$  transients did not change when the concentration of I was increased from 0.37 to 0.78 mM, the contractile force decreased. The effects of inhalational anesthetic agents at higher concentrations on  $Ca^{++}$  transients and contractile force in a typical preparation are seen in Figure 2.

**DISCUSSION.** The comparative influence of inhalational anesthetic agents was examined on contractile force and intracellular  $Ca^{++}$  transients in isolated cardiac muscle. The results of

our experiments indicate that: (1) the negative inotropic effect of I is less than that of either H or E at equipotent doses; (2) this effect is associated with smaller depression of the intracellular  $Ca^{++}$  concentration during I; and (3) at higher concentration of I, myocardial depression may involve other factors such as: decreased affinity of troponin C for  $Ca^{++}$  and/or reduced myofibrillar responsiveness to  $Ca^{++}$ , rather than inhibition of  $Ca^{++}$  influx<sup>2</sup> or depression of sarcoplasmic reticulum.<sup>3</sup> At the lower concentrations of I, H and E a decrease in intracellular  $Ca^{++}$  is at least in part due to a reduced calcium inward current, as directly measured using the whole-cell voltage clamp method in isolated cardiac cells.<sup>5</sup> In conclusion, I produces less myocardial depression than that produced by H or E in part due to a smaller depression of intracellular  $Ca^{++}$ .

#### REFERENCES.

1. Merin RG. Anesthesiology 55:398-408, 1981
2. Komai H, Rusy BF. Anesth Analg 66:29-33, 1987
3. Lynch C. Anesthesiology 64:620-631, 1986
4. Bosnjak ZJ et al. Am J Physiol 251:374-381, 1986
5. Bosnjak ZJ et al. Anesthesiology (Abst. 1988)

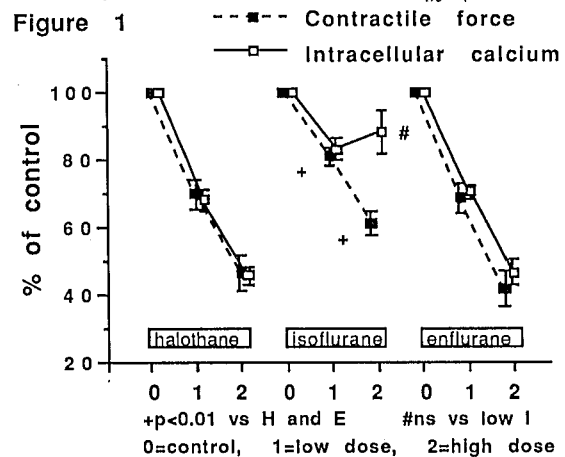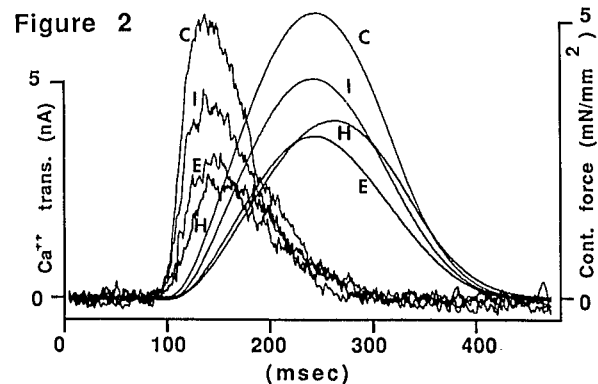

Source: https://asa2.silverchair.com/anesthesiology/article-pdf/69/3A/A88/641128/0000542-198809010-00088.pdf
